# Supplementary material for: BiKEGG: a COBRA toolbox extension for bridging the BiGG and KEGG databases
Source: Royal Society of Chemistry journal article supplement (doi:10.1039/c6mb00532b), 2016-09-16
Supplement: c6mb00532b3.xlsx [file c6mb00532b3.xlsx]

## Sheet: Sheet1
KEGG reaction identifier	BiGG abbr.	Literature evidence (PubMed ID)	Reconciled metabolite
R01706	FA160ACPHi	26485611
R08162	FA161ACPHi	26485611
R08163	FA180ACPH	26485611
R01560	ADA	18599447
R01244	ADD	24277855
R00182	AMPN	24277855
R04025	APRTO2	26812499
R01574	ARAB1D1	26812499
R01575	ARAB1D2	26812499
R00485	ASNN	26812499
R00485	ASNNe	26812499
R02521	34HPPOR	26812499
R02425	ALLTN	26812499
R03925	ALLTNti	26812499
R00005	ALPHNH	26812499
R03180	AMID	26812499
R02540	AMID2	26812499
R03096	AMID3	26812499
R00181	AMPDA	26812499
R05641	C24STRer	26812499
R02333	CHTNDA	26812499
R00510	CMPN	26812499
R02396	CSNATr	20823849
R02396	CSNATm	20823849
R02396	CSNATirm	20823849
R02396	CSNATp	20823849
R00974	CSND	26812499
R00571	CTPS1	26812499
R01001	CYSTGL	26812499
R01286	CYSTL	26812499
R01286	CYSTLp	26812499
R01878	CYTD	26812499
R02556	DADA	26812499
R01663	DCMPDA	26812499
R02325	DCTPD	26812499
R02485	DCYTD	26812499
R07217	DESAT14	24762737	*
R06091	DGGH	20587024	*
R01009	DOLPMTcer	26812499
R02750	DRBK	26812499
R05052	EHGLAT	26812499
R05052	EHGLATm	26812499
R05052	EHGLATp	26812499
R02568	FBA2	26812499
R00763	FBP26	20823849
R05002	G13MTg	27211857	*
R00765	G6PDA	26812499
R02739	G6Pter	20823849
R01092	GALKr	24277855
R04125	GCCbim	26812499
R01602	GLCt1	Manual check
R01602	GLCtv	Manual check
R00253	GLNS	26812499
R00243	GLUDxi	26812499
R00248	GLUDy	24277855
R00299	GLUK	21777427
R01600	GLUK	26812499
R00256	GLUN	26812499
R01736	GLYOX	26812499
R01736	GLYOXm	26812499
R00115	GTHOr	24277855
R00274	GTHPi	17462086	*
R00497	GTHS	26812499
R04371	HACNHm	26812499
R00084	HMBS	26812499
R01446	LCADm	20587024
R02530	LGTHL	26812499
R03199	LNSTLS	26812499
R00189	NADS1	24277855
R00189	NADS1m	Similar to NADS1
R01268	NNAM	24277855
R01268	NNAMrm	26812499
R03093	NTRLASE	26812499
R03542	NTRLASE2	21846360	*
R02732	PFK26	26812499
R01057	PPM	26812499
R01728	PPND	26812499
R01730	PPND2	26812499
R03222	PPPGOm	26812499
R01255	PROtm	22233419	*
R01049	PRPPS	26812499
R00277	PYAM5PO	26812499
R01710	PYDXO	26485611
R01051	RBK	26812499
R01056	RPI	26812499
R01787	SBTR	26812499
R00220	SERD_L	26812499
R00527	SFGTHi	24277855
R00999	SHSL4r	26812499
R02874	SQLEr	20823849
R00996	THRD_L	26812499
R00996	THRD_Lm	Similar to THRD_L
R01641	TKT1	26812499
R00734	TYRTA	26485611
R00734	TYRTAi	26812499
R00734	TYRTAm	26485611
R00734	TYRTAp	20587024
R00416	UDPACGLP	26812499
R00469	UGLYCH	24277855
R01221	GLYCLm	26812499
